# Supplementary material for: Lessons learned from building The Kid’s Trial with an online children’s and parents’ research advisory group: A descriptive, qualitative study.
Source: Research Square preprint supplement (doi:10.21203/rs.3.rs-6320309/v1), 2025-04-08
Supplement: Supplementary file 2 [file 26f77afd40b75ea642e52ac0.pdf]

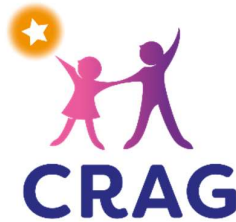

Children's Research Advisory Group

## Children's Research Advisory Group (CRAG) Expression of Interest Form

### What is this about?

- We are planning a research study with kids called **The Kid's Trial**.
- We need help planning our study and so we are asking kids to help us do this.
- The kids who help us plan **The Kid's Trial** will be members of our **CRAG**.

### **What is a CRAG?**

**C**hildren's  
**R**esearch  
**A**dvisory  
**G**roup

A CRAG is a group of kids who help us do research by telling us what they think.

**Children**- we're looking for kids between 7 & 12 years-old.

**Research**- an organised way we solve problems or find out facts about something.

**Advisory**- suggest ideas to find solutions to problems

**Group**- our group will be made up of about 8 kids

### Why do we need help planning our project?

We think kids are experts on all kid-type things. Since our research project is being done for and by kids, we believe they should help us plan it too.

-That's why we need a **CRAG**-

### What is research again?

- Research is an organised way to solve problems or find out facts about something.
- Sometimes in research we think of new ways to answer a question. This could mean we come up with a question, find a way we might answer or test our question, and do those tests.
- The type of research we are doing in **The Kid's Trial** is a randomised trial.

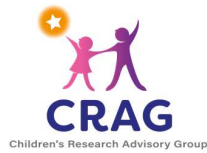

## CRAG Expression of Interest Form

### What is a randomised trial?

We are health researchers who focus on randomised trials.

- A randomised trial is a type of experiment that tests if something we do, like exercise, or something we use, like medicine when we are sick, makes a difference to our health.
- We call the things we test during the trial interventions or treatments.
- Mostly, researchers test the intervention by dividing people into groups randomly.
- One group in the trial gets the intervention or treatment, and the other group does not. After the trial is finished we look to see if the intervention made a difference to outcomes we are interested in.

### Who are we asking to join the CRAG?

We are looking for about eight children who:

- are between 7 and 12 years old
- can speak and understand English well
- are interested in helping us make our trial better
- want to be part of a kid-led project

We will invite kids to be part of our **CRAG** depending on where they are from and if they want to join in. We want to include kids from all kinds of places and all kinds of families.

We also have a Parents' Research Advisory Group (PRAG) and if you'd like to join the CRAG, one of your parents/caregivers will need to join our PRAG.

### What does joining the CRAG mean?

If you join the **CRAG** your job will be to:

- help us with our logo design
- help us come up with explanations about the project that make sense to kids
- tell us your ideas and opinions about our website
  - If you and your parent/caregiver agree you want to join, we'll send you more information about **The Kid's Trial** and when the **CRAG** will first meet.



## CRAG Expression of Interest Form

### How much time will being part of the CRAG take?

- The **CRAG** will meet about 6 times over the next 5 or 6 months.
- Each meeting shouldn't take us more than 45 minutes.
- All the meetings will be online over Zoom.
  - If you don't know how to use Zoom that's ok! We can show you.
- One of your parents or caregivers will join the first couple of meetings.
  - If after a couple of meetings you feel comfortable with the group, and your parent/caregiver agrees, you can join the meetings on your own.
- Sometimes we will ask you to think about something we send you before our meeting so everyone can come prepared.

### What if I want to

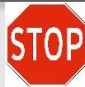

?

You don't have to join the **CRAG** and if you change your mind after you join, you can still stop any time and no one will be upset.

If you want to stop then just let us know- we're here to help!

### Who are we?

We are health researchers who study trials. The leader of the project, Simone, and her supervisor, Professor Devane work at the University of Galway in Ireland. Dr Flight works in the United Kingdom.

#### Contact Details

Project lead: Simone Lepage [s.lepage1@universityofgalway.ie](mailto:s.lepage1@universityofgalway.ie)

Lead researcher: Prof Devane [declan.devane@universityofgalway.ie](mailto:declan.devane@universityofgalway.ie)

Co-supervisor: Dr Flight [laura.flight@nice.uk.org](mailto:laura.flight@nice.uk.org)

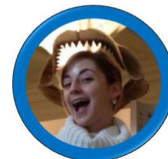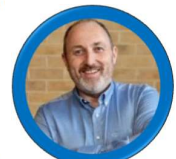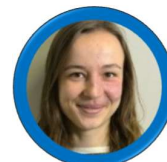

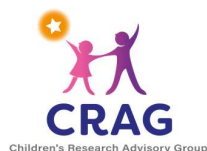

## CRAG Expression of Interest Form

### How do I join the CRAG?

If you would like to join, please fill out the form below and you or your caregiver or parent can return it **by May 30th, 2023** to: [TheKidsTrial@universityofgalway.ie](mailto:TheKidsTrial@universityofgalway.ie)

One of your parents or caregivers will also have to agree and fill out their own form to be part of the Parents' Research Advisory Group (PRAG).

We hope that being part of the **CRAG** is really fun for the kids who join us. We think it's a good way to get involved in research and a project that is created with and for kids!

|                                                                                          |                                                                                                                                                                                                                                                                                                    |
|------------------------------------------------------------------------------------------|----------------------------------------------------------------------------------------------------------------------------------------------------------------------------------------------------------------------------------------------------------------------------------------------------|
| <b>What is your name?</b>                                                                |                                                                                                                                                                                                                                                                                                    |
| <b>What is your caregiver's or parent's name?</b>                                        |                                                                                                                                                                                                                                                                                                    |
| <b>What country do you live in?</b>                                                      |                                                                                                                                                                                                                                                                                                    |
| <b>What is your parent's or caregiver's email address so that we can contact you?</b>    |                                                                                                                                                                                                                                                                                                    |
| <b>Why are you interested in being part of the CRAG? (you can choose more than one).</b> | <input type="checkbox"/> I want to know more about health research and trials.<br><input type="checkbox"/> I want to participate in a kid-led project.<br><input type="checkbox"/> I want to help researchers do a better job working with kids.<br><input type="checkbox"/> Not sure, I'm curious |
| <b>What would you like to learn by being a member of the CRAG?</b>                       |                                                                                                                                                                                                                                                                                                    |
| <b>I understand that if I have any questions I can contact the researchers.</b>          | <input type="checkbox"/> <b>YES</b><br><input type="checkbox"/> <b>NO</b>                                                                                                                                                                                                                          |
| <b>How did you hear about The Kid's Trial CRAG?</b>                                      | <input type="checkbox"/> Facebook <input type="checkbox"/> Instagram <input type="checkbox"/> Twitter<br><input type="checkbox"/> Friend or family member                                                                                                                                          |
| <b>I want to join the Children's Research Advisory Group (CRAG).</b>                     | <input type="checkbox"/> <b>YES</b><br><input type="checkbox"/> <b>NO</b>                                                                                                                                                                                                                          |

If you are not invited, this only means we had a lot of interest from where you live. You can still be part of **The Kid's Trial** when it starts and we hope you will be!

A copy of this form will be kept securely in The University of Galway until The Kid's Trial is concluded.  
 A copy of this form will be returned to the participant.
