# Supplementary material for: Lessons learned from building The Kid’s Trial with an online children’s and parents’ research advisory group: A descriptive, qualitative study.
Source: Research Square preprint supplement (doi:10.21203/rs.3.rs-6320309/v1), 2025-04-08
Supplement: Supplementary file 4 [file 90cd1a1a903dd48aad1c1db4.pdf]

| Step                                                                    | Action Items                                                                                                   | No. of minutes<br>CRAG | No. of minutes<br>PRAG |
|-------------------------------------------------------------------------|----------------------------------------------------------------------------------------------------------------|------------------------|------------------------|
|                                                                         | Allow for 240 mins of CRAG meetings and 200 mins outside-meeting review/work                                   | 440                    |                        |
|                                                                         | Allow for 250 mins of PRAG meetings + 170 mins outside-meeting review/work                                     |                        | 420                    |
| Pre-launch pre-meeting tasks                                            | Pre-meeting: Email link to Pre-trial Survey to participants                                                    | 5                      | 5                      |
|                                                                         | Pre-meeting: Email 'additional info' to participants                                                           | 5                      | 5                      |
| <b>1<sup>st</sup> CRAG/PRAG combined meeting:<br/>Pre-launch Step</b>   | Introduction to what The Kid's Trial is and what randomised trials are** and discussion of Pre-Trial Survey    | 10                     |                        |
|                                                                         | Goals for CRAG/PRAG                                                                                            | 3                      |                        |
|                                                                         | Expectations and guidelines**                                                                                  | 2                      |                        |
|                                                                         | Role discussion: CRAG secretary, CRAG chair, PRAG liaison, PRAG chair, PRAG secretary                          | 5                      |                        |
|                                                                         | Compensation plan discussion                                                                                   | 5                      |                        |
|                                                                         | Logo, colour scheme, and videos introduction and discussion.                                                   | 10                     |                        |
|                                                                         | Video review: What is TKT? What are RCTs?                                                                      | 10                     |                        |
|                                                                         | Final questions/ thoughts                                                                                      | 5                      |                        |
|                                                                         |                                                                                                                |                        |                        |
| Pre-launch post-meeting tasks                                           | Post-meeting: Colour scheme poll to be completed by next meeting                                               | 5                      | 5                      |
|                                                                         | Post-meeting: Logo design ideas to be emailed to SL by next meeting                                            | 25                     | 5                      |
|                                                                         | Post-meeting: Videos to be emailed to participants, poll for videos to be completed by next meeting            | 5                      | 5                      |
| <b>Total time:</b>                                                      | 45 mins in meeting + 45 mins CRAG outside-meeting work +25 mins PRAG outside-meeting work                      | 90                     | 70                     |
| Meeting #2 Pre-Meeting tasks                                            | Pre-meeting: Send out PILs for r/v                                                                             | 10                     | 10                     |
|                                                                         | Pre-meeting: Send out Step 1a, 1b, 1c videos                                                                   | 15                     |                        |
| <b>2<sup>nd</sup> CRAG/PRAG combined meeting:<br/>Pre-launch/Step 1</b> | Colour scheme, video polls R/V                                                                                 | 5                      |                        |
|                                                                         | Review submitted logo options and decide how we will come to a consensus, ie. Voting anonymously, mixing logos | 15                     |                        |
|                                                                         | Final Pre-Trial Survey agreed                                                                                  | 5                      |                        |
|                                                                         | R/V Step 1a, Step 1b, Step 1c Videos                                                                           | 10                     |                        |
|                                                                         | Discuss voice overs for videos                                                                                 | 5                      |                        |
|                                                                         | Discuss PIL and the language in them                                                                           | 5                      |                        |
|                                                                         | Final questions/thoughts/role change?                                                                          | 5                      |                        |
| Meeting #2 Post-meeting tasks                                           | Post-meeting PIL poll                                                                                          | 5                      | 10                     |
|                                                                         | Post-meeting Step 1a, 1b, 1c videos poll                                                                       | 10                     | 10                     |
| <b>Total time:</b>                                                      | 50 minutes in meeting + 40 mins CRAG outside-meeting work + 45 mins PRAG outside-meeting work                  | 90                     | 95                     |
| Meeting #3 (CRAG only) Pre-meeting                                      | Pre-meeting: Send out final logo poll                                                                          | 10                     |                        |
|                                                                         | Pre-meeting: Send out Step 2 video for R/V                                                                     | 10                     |                        |
| <b>3<sup>rd</sup> CRAG meeting (Stand-alone):<br/>Pre-launch/Step 1</b> | PIL, Step 1a, 1b, 1c videos poll R/V                                                                           | 10                     |                        |
|                                                                         | Discuss logo decision                                                                                          | 10                     |                        |

|                                                                         |                                                              |    |
|-------------------------------------------------------------------------|--------------------------------------------------------------|----|
|                                                                         | View website together for initial impressions and thoughts   | 10 |
|                                                                         | R/V Step 2 video                                             | 5  |
|                                                                         | Final questions/thoughts/role reassignment                   | 5  |
| Meeting #3 Post-meeting tasks                                           | Post-meeting: send Step 2 video & poll                       | 10 |
| <b>Total time:</b>                                                      | 40 mins + 30 mins outside-meeting work                       | 70 |
| 3 <sup>rd</sup> PRAG meeting (stand-alone)<br>Pre-meeting tasks         | Pre-meeting: Send out Step 2 survey for R/V                  | 5  |
|                                                                         | Pre-meeting: Send out Step 2 video for R/V                   | 5  |
| <b>3<sup>rd</sup> PRAG meeting (Stand-alone):<br/>Pre-launch/Step 1</b> | R/V PIL, Steps 1a, 1b, 1c videos feedback                    | 15 |
|                                                                         | Discuss social media recruitment routes                      | 10 |
|                                                                         | R/V step 2 video                                             | 5  |
|                                                                         | R/V step 2 survey                                            | 5  |
|                                                                         | Update on CRAG logo decision                                 | 5  |
|                                                                         | Final questions/thoughts/role reassignment                   | 5  |
| 3 <sup>rd</sup> PRAG meeting (Stand-alone)<br>post-meeting tasks        | Post-meeting social media ad feedback poll                   | 5  |
|                                                                         | Post-meeting: Step 2 video poll                              | 5  |
| <b>Total time</b>                                                       | 45 mins +20 mins outside-meeting work                        | 65 |
| 4 <sup>th</sup> CRAG meeting (stand-alone)<br>pre-meeting tasks         | Pre-meeting: Send out Steps 3, 4 videos for R/V              | 10 |
|                                                                         | Pre-meeting: Send out Surveys 4b, 4c for R/V                 | 10 |
| <b>4<sup>th</sup> CRAG meeting (stand-alone):<br/>Step 2</b>            | R/V Step 2 video poll                                        | 5  |
|                                                                         | R/V Steps 3, 4 videos                                        | 10 |
|                                                                         | R/V Surveys 4b, 4c                                           | 15 |
|                                                                         | Final questions/thoughts/role reassignment                   | 5  |
|                                                                         | Post-meeting: Survey 4b, 4c polls                            | 10 |
|                                                                         | Post-meeting: Steps 3, 4 video polls                         | 10 |
| <b>Total time:</b>                                                      | 35 mins + 40 mins outside-meeting work                       | 75 |
| 4 <sup>th</sup> PRAG meeting (stand-alone)<br>pre-meeting tasks         | Pre-meeting: Send out Steps 3, 4 videos for R/V              | 10 |
|                                                                         | Pre-meeting: Send out Surveys 4b, 4c for R/V                 | 10 |
| <b>4<sup>th</sup> PRAG meeting (stand-alone):<br/>Step 2</b>            | R/V social media ad, Step 2 video polls                      | 10 |
|                                                                         | Discuss social media changes if necessary/ r/v soc med polls | 10 |
|                                                                         | R/V Steps 3, 4 videos                                        | 10 |
|                                                                         | R/V Surveys 4b, 4c                                           | 10 |
|                                                                         | Final questions/thoughts/role reassignment                   | 5  |
| 4 <sup>th</sup> PRAG meeting (stand-alone)<br>post-meeting tasks        | Post-meeting: Survey 4b, 4c polls                            | 10 |
|                                                                         | Post-meeting: Steps 3, 4 video polls                         | 10 |
| <b>Total time:</b>                                                      | 45 mins + 40 mins outside-meeting work                       | 85 |
| 5 <sup>th</sup> CRAG meeting (stand-alone)<br>pre-meeting tasks         | Pre-meeting: Send Step 5 video for R/V                       | 5  |
|                                                                         | Pre-meeting: Send Step 5 Survey for R/V                      | 5  |
| <b>5<sup>th</sup> CRAG meeting (stand-alone):<br/>Step 3/ Step 4</b>    | R/V Steps 3, 4 Videos & Surveys 4b, 4c polls feedback        | 15 |
|                                                                         | R/V Step 5 video                                             | 5  |
|                                                                         | R/V Step 5 survey and discuss options of sharing results     | 15 |
|                                                                         | Final questions/thoughts/role reassignment                   | 5  |

|                                                                                       |                                                                                                                                                                           |                     |                  |
|---------------------------------------------------------------------------------------|---------------------------------------------------------------------------------------------------------------------------------------------------------------------------|---------------------|------------------|
| 5 <sup>th</sup> CRAG meeting (stand-alone)<br>post-meeting tasks                      | Post-meeting: step 5 video poll                                                                                                                                           | 5                   |                  |
|                                                                                       | Post-meeting: Step 5 survey poll                                                                                                                                          | 10                  |                  |
| <b>Total time:</b>                                                                    | 40 mins + 25 mins outside-meeting feedback                                                                                                                                | 65                  |                  |
| 5 <sup>th</sup> PRAG meeting (stand-alone)<br>pre-meeting tasks                       | Pre-meeting: Send out Step 5 video for R/V                                                                                                                                | 5                   |                  |
|                                                                                       | Pre-meeting: Send out Step 5 Survey for R/V                                                                                                                               | 5                   |                  |
| <b>5<sup>th</sup> PRAG meeting (stand-alone):<br/>Step 3/ Step 4</b>                  | R/V Steps 3, 4 Videos & Surveys 4b, 4c polls feedback                                                                                                                     | 15                  |                  |
|                                                                                       | R/V step 5 video                                                                                                                                                          | 5                   |                  |
|                                                                                       | R/V Step 5 survey                                                                                                                                                         | 10                  |                  |
|                                                                                       | Final questions/thoughts/role assignment                                                                                                                                  | 5                   |                  |
| 5 <sup>th</sup> PRAG meeting (stand-alone)<br>post-meeting tasks                      | Post-meeting: Step 5 video poll                                                                                                                                           | 5                   |                  |
|                                                                                       | Post-meeting: Survey 5 poll                                                                                                                                               | 5                   |                  |
| <b>Total time:</b>                                                                    | 35 mins + 20 mins outside-meeting feedback                                                                                                                                | 55                  |                  |
| 6 <sup>th</sup> CRAG/PRAG meeting<br>(combined) pre-meeting tasks                     | Pre-meeting: Send out interview expression of interest forms                                                                                                              | 10                  |                  |
|                                                                                       | Pre-meeting: Send out post-CRAG/PRAG Experience Survey                                                                                                                    | 10                  |                  |
| <b>6<sup>th</sup> CRAG/PRAG meeting<br/>(combined)</b>                                | R/V Step 5 video & survey poll results                                                                                                                                    | 10                  |                  |
|                                                                                       | R/V Interview expression of interest forms                                                                                                                                | 5                   |                  |
|                                                                                       | R/V CRAG/PRAG experience Survey                                                                                                                                           | 10                  |                  |
|                                                                                       | Discuss whether another meeting is desired                                                                                                                                | 5                   |                  |
| <b>Total time:</b>                                                                    | 30 mins + 20 mins outside-meeting feedback                                                                                                                                | 50                  |                  |
|                                                                                       | <b>Total</b>                                                                                                                                                              | 440 mins = 7.33 hrs | 420 mins = 7 hrs |
|                                                                                       | Number of days at 7.5h per day                                                                                                                                            | 0.98                | 0.93             |
|                                                                                       | <b>At €170 per DAY (quoted from NIHR all day cost of PPI contribution of £170/day/person) = 193.10 euro</b>                                                               | <b>€189.30</b>      | <b>€179.58</b>   |
|                                                                                       | Payments to children may need to be made through the caretaker/parent.<br>At 8 children and 8 adults: (8 x 189.30 = 1,514.40) + (8 x 179.58 = 1,436.66) = €2,951.06 total |                     |                  |
| <b>Should budget for additional 1-2 hours per person in case of needed amendments</b> |                                                                                                                                                                           |                     |                  |
