# Supplementary material for: Lessons learned from building The Kid’s Trial with an online children’s and parents’ research advisory group: A descriptive, qualitative study.
Source: Research Square preprint supplement (doi:10.21203/rs.3.rs-6320309/v1), 2025-04-08
Supplement: Supplementary file 5 [file 932b320e5d4ff341f28d4aee.pdf]

GRIPP 2 Checklist for Lessons learned from building The Kid's Trial with an online children's and parents' research advisory group: A descriptive qualitative study.

| Section and topic              | Item                                                                                  | Reported on page No |
|--------------------------------|---------------------------------------------------------------------------------------|---------------------|
| Section 1: Abstract of paper   |                                                                                       |                     |
| 1a: Aim                        | Report the aim of the study                                                           | 2                   |
| 1b: Methods                    | Describe the methods used by which patients and the public were involved              | 2-3                 |
| 1c: Results                    | Report the impacts and outcomes of PPI in the study                                   | 3                   |
| 1d: Conclusions                | Summarise the main conclusions of the study                                           | 3                   |
| 1e: Keywords                   | Include PPI, "patient and public involvement," or alternative terms as keywords       | 1                   |
| Section 2: Background to paper |                                                                                       |                     |
| 2a: Definition                 | Report the definition of PPI used in the study and how it links to comparable studies | 3-4                 |

|                                     |                                                                                                       |                     |
|-------------------------------------|-------------------------------------------------------------------------------------------------------|---------------------|
| 2b: Theoretical underpinnings       | Report the theoretical rationale and any theoretical influences relating to PPI in the study          | 3-5                 |
| 2c: Concepts and theory development | Report any conceptual or theoretical models, or influences, used in the study                         | 4-5                 |
| Section 3: Aims of paper            |                                                                                                       |                     |
| 3: Aim                              | Report the aim of the study                                                                           | 4                   |
| Section 4: Methods of paper         |                                                                                                       |                     |
| 4a: Design                          | Provide a clear description of methods by which patients and the public were involved                 | 5-9                 |
| 4b: People involved                 | Provide a description of patients, carers, and the public involved with the PPI activity in the study | 8, 10, Figure 1     |
| 4c: Stages of involvement           | Report on how PPI is used at different stages of the study                                            | 13, Table 2, Fig. 2 |

|                                                 |                                                                                                |                      |
|-------------------------------------------------|------------------------------------------------------------------------------------------------|----------------------|
| 4d: Level or nature of involvement              | Report the level or nature of PPI used at various stages of the study                          | 6-7, Table 2, Fig. 2 |
| Section 5: Capture or measurement of PPI impact |                                                                                                |                      |
| 5a: Qualitative evidence of impact              | If applicable, report the methods used to qualitatively explore the impact of PPI in the study | 7-9                  |
| 5b: Quantitative evidence of impact             | If applicable, report the methods used to quantitatively measure or assess the impact of PPI   | n/a                  |
| 5c: Robustness of measure                       | If applicable, report the rigour of the method used to capture or measure the impact of PPI    | 7-9                  |
| Section 6: Economic assessment                  |                                                                                                |                      |
| 6: Economic assessment                          | If applicable, report the method used for an economic assessment of PPI                        | n/a                  |
| Section 7: Study results                        |                                                                                                |                      |
| 7a: Outcomes of PPI                             | Report the results of PPI in the study, including both positive and negative outcomes          | 9-24                 |

|                          |                                                                                                                                                             |      |
|--------------------------|-------------------------------------------------------------------------------------------------------------------------------------------------------------|------|
| 7b: Impacts of PPI       | Report the positive and negative impacts that PPI has had on the research, the individuals involved (including patients and researchers), and wider impacts | 9-24 |
| 7c: Context of PPI       | Report the influence of any contextual factors that enabled or hindered the process or impact of PPI                                                        | 9-24 |
| 7d: Process of PPI       | Report the influence of any process factors, that enabled or hindered the impact of PPI                                                                     | 9-24 |
| 7ei: Theory development  | Report any conceptual or theoretical development in PPI that have emerged                                                                                   | n/a  |
| 7eii: Theory development | Report evaluation of theoretical models, if any                                                                                                             | 26   |

|                                       |                                                                                                                                                                                               |                             |
|---------------------------------------|-----------------------------------------------------------------------------------------------------------------------------------------------------------------------------------------------|-----------------------------|
| 7f: Measurement                       | If applicable, report all aspects of instrument development and testing (eg, validity, reliability, feasibility, acceptability, responsiveness, interpretability, appropriateness, precision) | n/a                         |
| 7 g: Economic assessment              | Report any information on the costs or benefit of PPI                                                                                                                                         | 7, Supporting Materials S.3 |
| Section 8: Discussion and conclusions |                                                                                                                                                                                               |                             |
| 8a: Outcomes                          | Comment on how PPI influenced the study overall. Describe positive and negative effects                                                                                                       | 24-28                       |
| 8b: Impacts                           | Comment on the different impacts of PPI identified in this study and how they contribute to new knowledge                                                                                     | 24-28, Table 3              |
| 8c: Definition                        | Comment on the definition of PPI used (reported in the Background section) and whether or not you would suggest any changes                                                                   | n/a                         |

|                                            |                                                                                                                                        |       |
|--------------------------------------------|----------------------------------------------------------------------------------------------------------------------------------------|-------|
| 8d: Theoretical underpinnings              | Comment on any way your study adds to the theoretical development of PPI                                                               | 27-28 |
| 8e: Context                                | Comment on how context factors influenced PPI in the study                                                                             | 24-28 |
| 8f: Process                                | Comment on how process factors influenced PPI in the study                                                                             | 24-28 |
| 8 g: Measurement and capture of PPI impact | If applicable, comment on how well PPI impact was evaluated or measured in the study                                                   | 26-28 |
| 8 h: Economic assessment                   | If applicable, discuss any aspects of the economic cost or benefit of PPI, particularly any suggestions for future economic modelling. | 27    |

|                                      |                                                                                                                                           |       |
|--------------------------------------|-------------------------------------------------------------------------------------------------------------------------------------------|-------|
| 8i: Reflections/critical perspective | Comment critically on the study, reflecting on the things that went well and those that did not, so that others can learn from this study | 26-27 |
|--------------------------------------|-------------------------------------------------------------------------------------------------------------------------------------------|-------|
