# Supplementary material for: Lessons learned from building The Kid’s Trial with an online children’s and parents’ research advisory group: A descriptive, qualitative study.
Source: Research Square preprint supplement (doi:10.21203/rs.3.rs-6320309/v1), 2025-04-08
Supplement: Supplementary file 7 [file e7585910c4d454120f136be9.pdf]

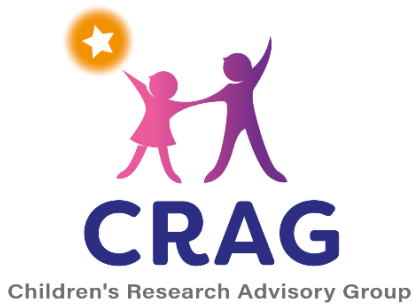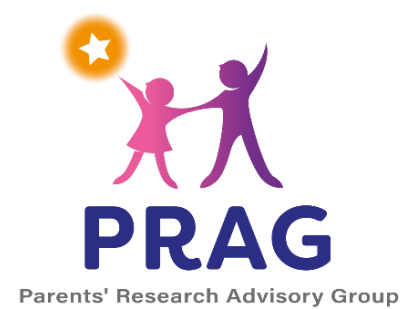

### **Expectations and Guidelines for Members of the Children's Research Advisory Group and Parents' Research Advisory Group for The Kid's Trial**

The Children's Research Advisory Group (CRAG) and Parent's Research Advisory Group (PRAG) are groups of volunteers that have come together to help plan The Kid's Trial. The groups will be meeting online through Zoom over the next four to six months. It is important that all participants understand the expectations of the group and how to make the experience enjoyable, welcoming and fun!

We ask that everyone keep the following guidelines in mind:

1. In order for us to work together and get to know each other, it may be helpful to turn on your webcam during meetings; however, every participant of the CRAG/PRAG has a right to privacy, and you are not required to turn on your camera. You can still be a member if you choose not to have your webcam turned on.
2. We suggest changing your Zoom user name to a first name or nickname if you wish to keep your surname private from the rest of the group.
3. We expect everyone to treat all members of the groups with respect and kindness. Members of the CRAG/PRAG come from all types of backgrounds and locations, and we want everyone to feel welcome.
4. In our meetings, we'll be deciding how our research project, The Kid's Trial, will be done. We need you to keep the information we talk about secret and not share it with anyone outside of our group until we're ready to tell everyone. This means not talking about our ideas, logos, designs, or advertisements.
5. We promise to keep your personal information safe and not share it with anyone else. The only people who will be able to see the information you share with us in the Expression of Interest forms (Name, Age, Email address, Country of Residence) are the project lead (Simone) and the Principal Investigator (Declan). Oh, and the parents of children taking part will also be able to see the information their own child shared on these forms.
6. We will keep the Expression of Interest Forms you fill out safe and secure in the University of Galway and only keep them for as long as we are doing the study. When the research study finishes, we will get rid of Expression of Interest Forms.
7. We will not be recording any of our Zoom meetings. Only the project leader or someone who knows how to take notes will write down what happened in the meetings. The notes won't say who

said what. For example, they might say “Someone said that they did not agree that purple should be included in the colour scheme for The Kid’s Trial logo” or “Six of the eight people who were at the meeting liked our ads for getting more kids to join the study.”

9. If you change your mind and don’t want to be part of the group anymore, you can stop at any time. If you do, we will send you a short survey to ask why, but you don't have to answer it if you don't want to.
