# Supplementary material for: Lessons learned from building The Kid’s Trial with an online children’s and parents’ research advisory group: A descriptive, qualitative study.
Source: Research Square preprint supplement (doi:10.21203/rs.3.rs-6320309/v1), 2025-04-08
Supplement: Supplementary file 8 [file ef7f629bc3b81e4e57052d9a.pdf]

## CRAG Interview Schedule

### Introduction, Assent & Getting Involved

1. **Warm-up Question:** How have you been? What has been happening in your life since we last spoke?
2. **Explanation & Assent:** Do you understand we're doing an interview today where I ask you questions and you tell me what you think honestly? We will not use your name, so no one will know who said what.
3. **Project Involvement:** How did you learn about joining the CRAG?

**Prompt:** Did you hear about it from your parent or online?

**F/U:** Can you tell me what you did as a CRAG member?

### Experience & Feelings

4. **Learning Process:** Can you tell me what you learned from being part of the CRAG?

**Prompt:** Did you learn anything about research? Did you learn anything about trials? Did you learn anything about other people or other places?

**F/U (follow-up):** What do you think was the most important thing you learned?

5. **Feelings:** How did you feel about being a CRAG member?

**Prompt:** Did you feel you had an important role?

Did your feelings change over time?

**F/U:** Can you tell me an example of how your feelings changed?

6. Did you enjoy being part of the CRAG?

**Prompt:** Did you like working on the website or having the meetings?

**F/U:** What did you enjoy the most?

7. **Project Contribution:** What are you most proud of about your work?

**F/U:** Why are you proud of this?

8. **Project Compensation:** How did getting paid for your work make you feel?

**F/U:** Do you think you learned anything about paid work from being part of the CRAG?

### Collaboration

9. **Team Interaction:** Can you tell me about a time when you worked together as a team with the other members of the CRAG, PRAG or your parent?

10. Did you think it was useful to have the grown-ups join us during some of the meetings?

**F/U:** Why or why not?

11. **Contribution and researcher interaction:** How did you share your ideas with me? Did you feel listened to? Did you ever not feel listened to by me?

**F/U:** Can you think of another way I should have asked for your opinions or ideas?

### **Challenges and Solutions**

12. **Difficulties:** Were there any tricky or hard parts of being part of the CRAG or helping design the trial?

**F/U:** What was tricky about that? How did you manage that?

13. Is there anything you wish I had done differently?

14. Is there anything you wish you had done differently?

### **Impact and Outcomes**

15. **Project Impact:** Do you think your work will help other kids, parents or researchers?

**F/U:** How do you think it might help?

### **Reflection and Future**

16. **Future Projects:** Would you like to help with another project like this in the future? Why or why not?

### **Conclusion**

17. **Final Thoughts:** Is there anything I haven't asked that you'd like to talk to me about?

### **PRAG Interview Schedule**

#### **Introduction, Consent & Getting Involved**

4. **Warm-up Question:** How have you been? What has been happening in your life since we last spoke?
5. **Explanation & Assent:** Do you understand we're doing an interview today where I ask you questions and you tell me what you think honestly? We will keep your name and your child's name anonymous, so no one will know who said what.

6. **Project Involvement:** How did you learn about joining the PRAG?

**Prompt:** Why do you think you were interested in joining?

**F/U:** Could you tell me what you did as a member of the PRAG?

### Experience & Feelings

9. **Learning Process:** Can you tell me if you learned anything as a member of the PRAG?

**Prompt:** Did you learn anything about health research or trials? Did you learn anything about your child?

**F/U:** What do you think was the most important thing you learned?

10. **Feelings:** How did you feel about being a PRAG member?

**Prompt:** Did you feel you had an important role?

Did your feelings change over time?

**F/U:** Can you tell me an example of how your feelings changed?

11. **Contribution:** What contribution do you think PRAG members made to The Kid's Trial?

**F/U:** Can you tell me what you think is the most important thing you did as a PRAG member?

12. **Child's Contribution:** What contribution do you think the CRAG members made to The Kid's Trial?

**F/U:** What do you think your child learned? Do you think this is important? Why?

### Collaboration

12. **Team Interaction:** Can you think of a time when you worked together as a team with the other members of the CRAG or PRAG, including your child?

13. **Contribution and researcher interaction:** Was it useful to have the adults present during the first few meetings with the children and researcher?

**F/U:** Why or why not?

14. **Contribution and researcher interaction:** How did you share your ideas with me? Did you feel listened to? Did you ever not feel listened to by me?

**F/U:** Can you think of another way I should have asked for your opinions or ideas?

### Challenges and Solutions

13. **Difficulties:** Were there any tricky or hard parts of being part of the PRAG or helping design the trial? Do you think there were any tricky parts for your child being part of the CRAG?

**F/U:** Why did you find that difficult, and how did you manage that?

**F/U:** Why do you think your child found that difficult and how did you and they manage that?

14. Is there anything you wish I had done differently?

15. Is there anything you wish you had done differently?

### **Impact and Outcomes**

16. **Project Impact:** Do you think your work will help other kids, parents or researchers?

**F/U:** How do you think it might help?

### **Reflection and Future**

17. **Future Projects:** Would you like to help with another project like this in the future? Why or why not?

### **Conclusion**

15. **Final Thoughts:** Is there anything else you'd like to share about your experience?
